# Supplementary material for: In Vivo Efficacy of Lacticaseibacillus rhamnosus L8020 in a Mouse Model of Oral Candidiasis
Source: MDPI journal article supplement (doi:10.3390/jof7050322), 2021-04-21
Supplement: s1 [file s1]

Table S1. Primers and probes used for real-time PCR.

| Target name    |          | Sequence (5'–3')                       |
|----------------|----------|----------------------------------------|
| CCL2           | Primer F | ATGCAGGTCCCTGTCATGC                    |
|                | Primer R | CATCTTGCTGGTGAATGAGTAGC                |
|                | Probe    | 6FAM-TCTGGGCCTGCTGTTACAGTTGC-TAMRA     |
| CXCL1/KC       | Primer F | CTGCACCCAAACCGAAGTC                    |
|                | Primer R | AGCTTCAGGGTCAAGGCAAG                   |
|                | Probe    | 6FAM-CACTCAAGAATGGTCGCGAGGC-TAMRA      |
| Dectin-1       | Primer F | ACAAGCCACAGAATCATCTTTAG                |
|                | Primer R | GATCCAATTAGGAAGGCAAGACTG               |
|                | Probe    | 6FAM-AGGTGGCTCCCTCCAAGGCATCCC-TAMRA    |
| Dectin-2       | Primer F | AACCCCTGACCTTCTGAACATAC                |
|                | Primer R | CGCAATGAAACAGGTACTCAAGAG               |
|                | Probe    | 6FAM-ATCACAGCAGCTGACCAGAGTCTCAGG-TAMRA |
| TLR-2          | Primer F | GGAAGTGTGCGAGGTAGAGTTTCG               |
|                | Primer R | TTTCTACTTTACCCAGCTCGCTCA               |
|                | Probe    | 6FAM-ACCCTCAATGGGCTCGGCGATTTC-TAMRA    |
| TLR-4          | Primer F | AAACTTGCCTTCAAAACCTGGC                 |
|                | Primer R | ACCTGAACTCATCAATGGTCACATC              |
|                | Probe    | 6FAM-CACGTCCATCGGTTGATCTTGGGAGAA-TAMRA |
| $\beta$ -actin | Primer F | CCACACTGTGCCCATCTACG                   |
|                | Primer R | GTGGTGGTGAAGCTGTAGCC                   |
|                | Probe    | 6HEX-CCTGCGTCTGGACCTGGCTGGC-TAMRA      |

Note: Forward primers (Primer F), reverse primers (Primer R), and probes are listed.
